# Supplementary material for: Predictors of clinical outcome following transcatheter aortic valve implantation: a prospective cohort study
Source: PubMed Central journal article supplement — Open Heart. 2021 Sep 23;8(2):e001766. doi: 10.1136/openhrt-2021-001766 (PMC8461740; doi:10.1136/openhrt-2021-001766), 2021-09-23
Supplement: openhrt-2021-001766supp001.pdf [file openhrt-2021-001766supp001.pdf]

**Supplement:**

*Supplementary Table S1. Clavien-Dindo Classification of surgical complications.*[1, 2]

| <b>Grade</b> | <b>Definition</b>                                                                                                                                                                                                                                                                                                                                                 |
|--------------|-------------------------------------------------------------------------------------------------------------------------------------------------------------------------------------------------------------------------------------------------------------------------------------------------------------------------------------------------------------------|
| <b>I</b>     | Any deviation from the normal postoperative course without the need for pharmacological treatment, or surgical, endoscopic, and radiological interventions.<br>Allowed therapeutic regimens are: drugs as antiemetic's, antipyretics, analgesics, diuretics and electrolytes, and physiotherapy. This grade also includes wound infections opened at the bedside. |
| <b>II</b>    | Requiring pharmacological treatment with drugs other than such allowed for grade I complications. Blood transfusions and total parenteral nutrition are also included.                                                                                                                                                                                            |
| <b>III</b>   | Complication requiring surgical, endoscopic, or radiological intervention                                                                                                                                                                                                                                                                                         |
| <b>IIIa</b>  | Intervention not under general anesthesia                                                                                                                                                                                                                                                                                                                         |
| <b>IIIb</b>  | Intervention under general anesthesia                                                                                                                                                                                                                                                                                                                             |
| <b>IV</b>    | Life-threatening complication (including central nervous system complications) requiring intensive care unit management                                                                                                                                                                                                                                           |
| <b>IVa</b>   | Single organ dysfunction (including dialysis)                                                                                                                                                                                                                                                                                                                     |
| <b>IVb</b>   | Multi-organ dysfunction                                                                                                                                                                                                                                                                                                                                           |
| <b>V</b>     | Death of a patient                                                                                                                                                                                                                                                                                                                                                |

1. Clavien PA, Barkun J, De Oliveira ML, et al. The clavien-dindo classification of surgical complications: Five-year experience. *Ann Surg* 2009;250(2):187-196.
2. Dindo D, Demartines N, Clavien PA. Classification of surgical complications: A new proposal with evaluation in a cohort of 6336 patients and results of a survey. *Ann Surg* 2004;240(2):205-213.
